# Supplementary material for: Genome-Wide Detection of Copy Number Variations Associated with Miniature Features in Horses
Source: MDPI journal article supplement (doi:10.3390/genes14101934), 2023-10-13
Supplement: s1 [file s1]

Table: S1. Summary of samples sequenced in study

| Sample name | Number of sequences | Number of bases (bp) | Average sequence length (bp) | Sequencing depth | Alignment percentage (%) |
|-------------|---------------------|----------------------|------------------------------|------------------|--------------------------|
| BS01        | 180643250           | 27036327450          | 149.7                        | 10.81453098      | 99.94                    |
| BS02        | 172455410           | 25805248216          | 149.6                        | 10.32209929      | 99.93                    |
| BS03        | 179578456           | 26879437920          | 149.7                        | 10.75177517      | 99.94                    |
| BS04        | 213752930           | 31987464124          | 149.6                        | 12.79498565      | 99.94                    |
| BS05        | 172264042           | 25778136512          | 149.6                        | 10.3112546       | 99.92                    |
| BS06        | 179096582           | 26802573276          | 149.7                        | 10.72102931      | 99.94                    |
| BS07        | 178730404           | 26744690486          | 149.6                        | 10.69787619      | 99.94                    |
| BS08        | 178030710           | 26637805940          | 149.6                        | 10.65512238      | 99.93                    |
| BS09        | 185967828           | 27830536868          | 149.7                        | 11.13221475      | 99.93                    |
| BS10        | 170798332           | 25560504490          | 149.7                        | 10.2242018       | 99.94                    |
| DB01        | 183125428           | 27407461344          | 149.7                        | 10.96298454      | 99.93                    |
| DB02        | 186377810           | 27891923450          | 149.7                        | 11.15676938      | 99.94                    |
| DB03        | 181638308           | 27185743512          | 149.7                        | 10.8742974       | 99.94                    |
| DB04        | 177754976           | 26602566854          | 149.7                        | 10.64102674      | 99.97                    |
| DB05        | 183032800           | 27393885818          | 149.7                        | 10.95755433      | 99.94                    |
| DB06        | 175456020           | 26262025676          | 149.7                        | 10.50481027      | 99.94                    |
| DB07        | 169420658           | 25351701650          | 149.6                        | 10.14068066      | 99.94                    |
| DB08        | 177286294           | 26524910610          | 149.6                        | 10.60996424      | 99.94                    |
| DB09        | 173516106           | 25965321682          | 149.6                        | 10.38612867      | 99.94                    |
| DB10        | 171389228           | 25648714332          | 149.7                        | 10.25948573      | 99.93                    |
| WB01        | 175413460           | 26254488820          | 149.7                        | 10.50179553      | 99.95                    |
| WB02        | 218837182           | 32749662596          | 149.7                        | 13.09986504      | 99.94                    |
| WB03        | 183595794           | 27482861162          | 149.7                        | 10.99314446      | 99.94                    |
| WB04        | 179200698           | 26814795436          | 149.6                        | 10.72591817      | 99.93                    |
| WB05        | 188065484           | 28150993900          | 149.7                        | 11.26039756      | 99.94                    |
| WB06        | 185837636           | 27816279662          | 149.7                        | 11.12651186      | 99.95                    |
| Average     | 181587147.2         | 27175617761          | 149.67                       | 10.8702471       | 99.94                    |
