# Supplementary material for: Genome-Wide Detection of Copy Number Variations Associated with Miniature Features in Horses
Source: MDPI journal article supplement (doi:10.3390/genes14101934), 2023-10-13
Supplement: s1 [file s1]

## Functional Annotation of CNVR in Debao Horse

**Table S4 KEGG pathway analysis of DB**

| Category         | Term                                             | Count | PValue          | Genes                                                                                                                                            |
|------------------|--------------------------------------------------|-------|-----------------|--------------------------------------------------------------------------------------------------------------------------------------------------|
| KEGG_PA<br>THWAY | ecb05150:Staphylococcus aureus infection         | 13    | 0.0016462<br>53 | KRT10A、DEFA31L、DQB2、DEFA22、DEFA5L、DQA3、DQB1、CFH、DQA1、DRB、ITGB2、ECATH-3、DQA2                                                                      |
| KEGG_PA<br>THWAY | ecb04514:Cell adhesion molecules                 | 17    | 0.0016479<br>25 | F11R、MHCX1、CDH2、CNTN1、CDH5、DQB2、VTCN1、PTPRC、EQMCE1、ITGA8、DQA3、DQB1、ITGB8、DQA1、DRB、ITGB2、DQA2                                                     |
| KEGG_PA<br>THWAY | ecb04612:Antigen processing and presentation     | 11    | 0.0024340<br>9  | EQMCE1、MHCX1、KLRD1、Hsp70、DQA3、DQB1、CTSB、DQB2、DQA1、DRB、DQA2                                                                                       |
| KEGG_PA<br>THWAY | ecb04024:cAMP signaling pathway                  | 19    | 0.0033432<br>94 | CAMK2D、EDN3、PDE3A、HTR1E、GLI3、GNAI2、CNGB3、NPY、SSTR1、HTR1A、SOX9、ADCYAP1、GCG、PTGER3、SST、MAP2K2、HTR1F、ROCK2、ROCK1                                    |
| KEGG_PA<br>THWAY | ecb04726:Serotonergic synapse                    | 13    | 0.0035760<br>06 | HTR1E、ALOX5、GNAI2、HTR7、HTR1A、CYP2C108、CYP4X1、HTR5A、GNAO1、PLA2G4A、HTR1F、GNG11、ALOX15B                                                             |
| KEGG_PA<br>THWAY | ecb05416:Viral myocarditis                       | 10    | 0.0046308<br>48 | EQMCE1、MHCX1、DQA3、DQB1、DQB2、DQA1、DRB、ITGB2、CASP8、DQA2                                                                                            |
| KEGG_PA<br>THWAY | ecb05145:Toxoplasmosis                           | 12    | 0.0060654<br>7  | MAP3K7、CCR5、GNAO1、DQA3、ALOX5、DQB1、GNAI2、DQB2、DQA1、DRB、CASP8、DQA2                                                                                 |
| KEGG_PA<br>THWAY | ecb05323:Rheumatoid arthritis                    | 11    | 0.0069746<br>85 | CXCL6、ATP6V1H、DQA3、DQB1、DQB2、ACP5、CXCL8、DQA1、DRB、ITGB2、DQA2                                                                                      |
| KEGG_PA<br>THWAY | ecb04080:Neuroactive ligand-receptor interaction | 25    | 0.0147565<br>43 | UCN3、HTR1E、NPY、OPRM1、GALR1、ADCYAP1、PTH2R、GCG、TACR3、PTGER3、HTR5A、GABRG1、SST、HTR1F、CYSLTR2、EDN3、NMBR、HTR7、SSTR1、HTR1A、GHR、QRFPR、GRID2、GABRR1、CHRM3 |
| KEGG_PA          | ecb04921:Oxygen                                  | 13    | 0.0161686       | PRKAB2、CAMK2D、GNAI2、EGFR、                                                                                                                        |

|                  |                             |    |                                                                                                                                                                                                                                                                                                                                                                                                                                                                                                                                                                                                                                                                 |    |
|------------------|-----------------------------|----|-----------------------------------------------------------------------------------------------------------------------------------------------------------------------------------------------------------------------------------------------------------------------------------------------------------------------------------------------------------------------------------------------------------------------------------------------------------------------------------------------------------------------------------------------------------------------------------------------------------------------------------------------------------------|----|
| THWAY            | tocin signaling pathway     | 08 | MYLK3, RGS2, GNAO1, PLA2G4A, MAP2K2, ROCK2, CACNB2, ROCK1, TRPM2 SGMS1, NANP, CARNMT1, AHCYL2, ENO4, SELENBP1, PLOD2, ALOX5, MINPP1, POMK, B3GALT1, ADPGK, EHMT1, PLA2G4A, ATP6V1H, CYP3A96, TYRP1, CYP7A1, GALNT14, ST6GAL2, PLCD4, NDST4, ASRGL1, SI, ST6GALNAC4, KMT2C, MOCS1, CYP11B1, HYAL4, MGAT4C, LPCAT4, PIGB, HTR5A, TMEM189, GUCY2D, MYLK3, ALOX15B, CYP2B6, MAN1A2, B3GALNT1, BLVRA, ADK, ELOVL3, FAH, FBP2, GCNT1, FBP1, PLCZ1, CYP2B46, CNDP2, PIK3C3, HTR1A, PDE5A, CNDP1, ITGB2, SORD, MAT2B, IMPA1, NT5E, ACP5, ACADSB, SGPL1, ACO1, PDE3A, AK6, NAMPT, ENPP3, CXCL6, GNPDA2, C1GALT1, ABO, CYP2C108, SPTLC3, SPAM1, GSTA3, PIP5KL1, ND5, UXS1 |    |
| KEGG_PA<br>THWAY | ecb01100:Metabolic pathways | 78 | 0.0336406                                                                                                                                                                                                                                                                                                                                                                                                                                                                                                                                                                                                                                                       | 81 |

**Table S5 GO pathway analysis of DB**

| Category         | Term                                                       | Count | PValue          | Genes                                                                                                                           |
|------------------|------------------------------------------------------------|-------|-----------------|---------------------------------------------------------------------------------------------------------------------------------|
| GOTERM_BP_DIRECT | GO:0007268~chemical synaptic transmission                  | 16    | 4.05E-04        | HTR1E, SYT10, SNCA, HTR7, HTR1A, OR5T40, HTR5A, LRP8, GABRG1, LRP6, SV2C, SDCBP, HTR1F, CACNB2, GABRR1, CHRM3                   |
| GOTERM_BP_DIRECT | GO:1990830~cellular response to leukemia inhibitory factor | 10    | 0.0058125<br>96 | SPRY2, TEX14, PAX6, NUP35, NR5A2, SSTR1, MRPL15, TFRC, EEF1E1, PADI2                                                            |
| GOTERM_BP_DIRECT | GO:0043066~negative regulation of apoptotic process        | 19    | 0.0083762<br>92 | GLI3, DAPK1, NUP35, PRAME, VTCN1, CITED2, EGFR, AMIGO2, GCG, RASA1, SPRY2, CDC73, TCL1A, PROP1, WNT7A, SMO, CAPN13, TFRC, ASCL1 |
| GOTERM_BP_DIRECT | GO:0007156~homophilic                                      | 12    | 0.0091961<br>52 | CDH2, CDH5, CDH12, FAT3, CDH19, KIRREL3, PCDH20, CDH11, PCDH7, PCDHAC2, CELSR3,                                                 |

|                      |                                                                                 |     |                 |                                                                                                                                                                                                                                                                                                                                                                                                                                                                                                                                                                                                                                                                                                                                      |
|----------------------|---------------------------------------------------------------------------------|-----|-----------------|--------------------------------------------------------------------------------------------------------------------------------------------------------------------------------------------------------------------------------------------------------------------------------------------------------------------------------------------------------------------------------------------------------------------------------------------------------------------------------------------------------------------------------------------------------------------------------------------------------------------------------------------------------------------------------------------------------------------------------------|
|                      | cell adhesion<br>via plasma<br>membrane<br>adhesion<br>molecules<br>GO:0010628~ |     |                 | PCDH10                                                                                                                                                                                                                                                                                                                                                                                                                                                                                                                                                                                                                                                                                                                               |
| GOTERM_BP<br>_DIRECT | positive<br>regulation of<br>gene<br>expression                                 | 20  | 0.0289531<br>68 | YAP1, ZNF804A, CNTN1, CDH5, ETS1, NGF,<br>SOX9, CITED2, SOX11, SPRY2, PIP, PAX6,<br>WNT7A, FAM98A, ITGB8, SHH, ROCK2,<br>CXCL8, SMO, ROCK1                                                                                                                                                                                                                                                                                                                                                                                                                                                                                                                                                                                           |
| GOTERM_CC<br>_DIRECT | GO:0045202~<br>synapse                                                          | 27  | 8.04E-05        | HTR1E, SNCA, GNAI2, SLC16A1, AP3B1,<br>TIAM2, OR5T40, HTR5A, CBLN2, GABRG1,<br>LRP6, HTR1F, ACTBL2, CACNB2, VWC2,<br>CYFIP1, SYT10, RIMS2, CAPRIN1, HTR7,<br>HTR1A, CBLN4, LRP8, SDCBP, LY6E, GABRR1,<br>CHRM3                                                                                                                                                                                                                                                                                                                                                                                                                                                                                                                       |
| GOTERM_CC<br>_DIRECT | GO:0005887~<br>integral<br>component of<br>plasma<br>membrane                   | 46  | 0.0203340<br>15 | OR56A1, SGMS1, SLC26A8, HTR1E, OR4E2,<br>KLRD1, SYNDIG1, PCDH20, MERTK, OPRM1,<br>PCDH7, GALR1, GYPA, SLC16A1, SLC39A12,<br>OR5T40, HTR5A, GABRG1, HTR1F, CYSLTR2,<br>SEMA6D, PCDH10, ADGRE1, SLC26A11,<br>SLCO1B3, NMBR, TMPRSS11A, HTR7, SSTR1,<br>ABCB5, HTR1A, CEMIP2, PROKR1, KIRREL3,<br>GHR, QRFPR, TRPM1, PKD2L1, PCDHAC2, IYD,<br>SLCO4C1, KCNK2, TFRC, TRPM2, GABRR1,<br>CHRM3                                                                                                                                                                                                                                                                                                                                             |
| GOTERM_CC<br>_DIRECT | GO:0030425~<br>dendrite                                                         | 16  | 0.0226365<br>45 | HTR1E, KIF21B, GNAI2, HTR7, ZWINT, NGF,<br>HTR1A, OR5T40, HTR5A, MARK2, STX3,<br>GNAO1, FAT3, HTR1F, SMO, CHRM3                                                                                                                                                                                                                                                                                                                                                                                                                                                                                                                                                                                                                      |
| GOTERM_CC<br>_DIRECT | GO:0031965~<br>nuclear<br>membrane                                              | 11  | 0.0228810<br>59 | MYO6, LYPLA1, MINDY3, CDH5, TMEM18,<br>ALOX5, SDCBP, NUP35, RAP1GAP2, CUEDC2,<br>THAP7                                                                                                                                                                                                                                                                                                                                                                                                                                                                                                                                                                                                                                               |
| GOTERM_CC<br>_DIRECT | GO:0005886~<br>plasma<br>membrane                                               | 142 | 0.0252194<br>68 | CCR5, CDH12, RAB4A, OPRM1, AMPH, XKR5,<br>MAPKAP1, LRP6, MINDY3, NUP35, TCAF2,<br>SHH, OR11H5, SULF2, SEMA6D, PCDH10,<br>ARL4C, LYPLA1, SYT10, PREX1, HTR7,<br>OR10Q2, SRPK1, COBL, CEMIP2, LRP8, PRAME,<br>FAT3, SLC34A2, ARRDC1, OR6V1, LY6E, TNK2,<br>GPD1L, ZP4, OR6X1, RHBDL2, MPP7, GSDMC,<br>CTTN, FRMD8, FBP1, HJV, SOX11, PTH2R,<br>TACR3, RASA1, CLEC12A, NIPA2, PTGER3,<br>LY49B, STX3, GFRA2, SLC5A4, OR5C1, ENAH,<br>LANCL2, ZNF804A, DAPK1, CYFIP1, WDPCP,<br>CELSR3, GAS1, SPAM1, LINGO2, OR6C315,<br>OR11A1, GHR, TFRC, TRPM2, OR5P95, VEPH1,<br>OR4F14Q, OR10C1, F11R, STXBP6, ACVR2A,<br>STEAP1, LAIR1, ATP23, ANO5, CDH19, DYNAP,<br>ROCK2, ROCK1, PALS2, ADGRE1, VANGL1,<br>CST3, OR4F80C, ENOX1, RGS2, MICALL2, |

|                      |                                       |     |                 |                                                                                                                                                                                                                                                                                                                                                                                                                                                                                                                                                                                                                                                                                                                                                                                                                                                                                                                                                                                                                                                                                                                                                                                                                                                                                                                                                                                                                                                                                                  |
|----------------------|---------------------------------------|-----|-----------------|--------------------------------------------------------------------------------------------------------------------------------------------------------------------------------------------------------------------------------------------------------------------------------------------------------------------------------------------------------------------------------------------------------------------------------------------------------------------------------------------------------------------------------------------------------------------------------------------------------------------------------------------------------------------------------------------------------------------------------------------------------------------------------------------------------------------------------------------------------------------------------------------------------------------------------------------------------------------------------------------------------------------------------------------------------------------------------------------------------------------------------------------------------------------------------------------------------------------------------------------------------------------------------------------------------------------------------------------------------------------------------------------------------------------------------------------------------------------------------------------------|
|                      |                                       |     |                 | <p>NEDD4, OR10V1, SDCBP, LMBRD1, CDH11, PARP14, PCDHAC2, OR11A1B, GRID2, GUCY2D, ALOX15B, ADK, CNTN1, PLCL1, PANX1, OR4C199, STXBP5, FTO, OR4P7, CSMD3, LY49F, OR2J3H, TCAF1, LY49E, NT5E, VLDLR, MAP3K7, CYP2B46, OR4F80, SLCO1B3, CAPN9, TAS1R2, DMBT1, ADGRA3, OR2W6, OR5J1, OR4F80B, KCNT2, TMEFF2, PKP2, OR2BD2, DUSP22, SLCO4C1, KCNK2, RPSA, SMO, RGS13, RAP1GAP2, STX17</p> <p>PRKAB2, TRIM45, SMAP1, ALOX5, RMDN1, TWIST2, SCAF8, AMPH, PPP1R14C, PRUNE2, MAPKAP1, GCG, PDE4DIP, CSRP1, ELP4, PRMT3, ACTBL2, PPFIA1, LYPLA1, TACC3, CARS1, SASH1, IRAK1BP1, PRAME, ASPM, SRPK1, MYLK3, TNFAIP3, VWA8, MOB1B, SKP1, ARRDC1, KLHL25, TNK2, ROPN1L, FBXO4, SNCA, MERTK, CXXC4, FBP1, ARHGEF11, TIAM2, EYA4, CASP8, NOVA1, PIK3C3, AGA, MAP2K2, CDIN1, ENAH, ZNF804A, CYFIP1, HTATIP2, SERPINB5, DAPK1, WDPCP, CAPRIN1, DICER1, CHD1, PLK2, PTPN22, CEBPB, UXS1, ATXN7L3B, ARHGAP28, KCNIP4, PADI4, CDH2, BATF, ACVR2A, MYO5B, URI1, PLA2G4A, RNF111, ROCK2, ROCK1, PADI2, CAMK2D, SHROOM3, UBR3, TBCA, ASRGL1, GLI3, TENT5A, TRIM68, RGS2, NEDD4, DOK5, SGK1, GARNL3, SDCBP, CDH11, ACTR1B, HSPB8, PARP14, CCNE1, PCDHAC2, ALOX15B, DEUP1, CYP2B6, MRTO4, RNF167, NAP1L4, BLVRA, TRIM21, CRACR2A, FBP2, TRIM26, STXBP5, ANXA10, CYP2B46, FTO, MARK2, SAMD5, POC5, ELP3, FAP221, LGALS3, SNTG1, CAPN13, YAP1, MAP3K7, ACO1, AK6, ASAP2, NAMPT, CAPN9, NR5A2, CLMN, GNPDA2, PADI3, CYP2C108, SCGB1A1, PTPN11, RBFOX2, PKP2, ANXA5, LRRCC1, DUSP22, FKBP1A, LRRC3, PER2, RAP1GAP2, PARP15</p> |
| GOTERM_CC<br>_DIRECT | GO:0005737~<br>cytoplasm              | 144 | 0.0257213<br>83 | <p>VLDLR, NR3C2, MERTK, ACVR2A, IL23R, NT5DC3, KCTD8, EGFR, LRP8, IL12RB2, GHR, GFRA2, PKD2L1</p> <p>KCNIP4, MAN1A2, CDH2, PADI4, CDH5, CDH12, CRACR2A, PCDH20, PCDH7, ANXA10, PLCZ1, MINDY3, PLA2G4A, CDH19, SHH, CAPN13, SULF2, PCDH10, PADI2, VLDLR, PLCD4, ADGRE1, SYT10, SPOCK3, CAPN9, CETN1, PADI3, CELSR3, CEMIP2, LRP8,</p>                                                                                                                                                                                                                                                                                                                                                                                                                                                                                                                                                                                                                                                                                                                                                                                                                                                                                                                                                                                                                                                                                                                                                             |
| GOTERM_CC<br>_DIRECT | GO:0043235~<br>receptor<br>complex    | 13  | 0.0329870<br>78 |                                                                                                                                                                                                                                                                                                                                                                                                                                                                                                                                                                                                                                                                                                                                                                                                                                                                                                                                                                                                                                                                                                                                                                                                                                                                                                                                                                                                                                                                                                  |
| GOTERM_M<br>F_DIRECT | GO:0005509~<br>calcium ion<br>binding | 38  | 0.0096664<br>86 |                                                                                                                                                                                                                                                                                                                                                                                                                                                                                                                                                                                                                                                                                                                                                                                                                                                                                                                                                                                                                                                                                                                                                                                                                                                                                                                                                                                                                                                                                                  |

---

ANXA5、FAT3、MATN1、CDH11、PKD2L1、  
PCDHAC2、TRPM2、ALOX15B

---
