# Supplementary material for: Genome-Wide Detection of Copy Number Variations Associated with Miniature Features in Horses
Source: MDPI journal article supplement (doi:10.3390/genes14101934), 2023-10-13
Supplement: s1 [file s1]

## Functional Annotation of CNVR in three horse breed

**Table S2 KEGG pathway analysis**

| KEGG Pathway                                 | Gene Count | P Value     | Gene                                                                                                                   |
|----------------------------------------------|------------|-------------|------------------------------------------------------------------------------------------------------------------------|
| ecb04612:Antigen processing and presentation | 14         | 1.41E-04    | MHCX1, KLRD1, HSPA4, HSPA1L, IFNG, CTSB, LRRC9, EQMCE1, DRB1, DQA3, DQB1, DQA1, DRB2, DQA2                             |
| ecb05321:Inflammatory bowel disease          | 12         | 3.89E-04    | DRB1, IFNGR2, IL12RB2, IFNG, FRAS1, FRAS1, IL23R, DQB2, DQA1, DRB2, IL18RAP, DQA2                                      |
| ecb04726:Serotonergic synapse                | 16         | 4.14E-04    | ALOX12, HTR1E, ALOX5, GNAI2, KCNJ6, HTR7, HTR1A, CYP2C108, CYP4X1, HTR5A, GNAO1, PLA2G4A, HTR1F, KCND2, GNG11, ALOX15B |
| ecb05145:Toxoplasmosis                       | 15         | 6.58E-04    | MAP3K7, IFNGR2, CCR5, HSPA1L, ALOX5, IFNG, GNAI2, DQB2, DRB1, GNAO1, DQA3, DQB1, DQA1, DRB2, DQA2                      |
| ecb05150:Staphylococcus aureus infection     | 14         | 0.001589502 | KRT10A, DEFA31L, DQB2, DEFA22, DEFA5L, DRB1, DQA3, DQB1, CFH, DQA1, DRB2, ITGB2, ECATH-3, DQA2                         |
| ecb05323:Rheumatoid arthritis                | 13         | 0.001979771 | IFNG, DQB2, DRB1, DQA3, DQB1, CXCL6, ATP6V1H, CXCL8, DQA1, ACP5, DRB2, ITGB2, DQA2                                     |
| ecb04514:Cell adhesion molecules             | 18         | 0.002371425 | F11R, MHCX1, CDH2, CNTN1, VCAN, DQB2, VTCN1, PTPRC, EQMCE1, DRB1, ITGA8, DQA3, DQB1, ITGB8, DQA1, DRB2, ITGB2, DQA2    |
| ecb05332:Graft-versus-host disease           | 11         | 0.002491976 | EQMCE1, DRB1, MHCX1, KLRD1, IFNG, DQA3, DQB1, DQB2, DQA1, DRB2, DQA2                                                   |
| ecb05140:Leishmaniasis                       | 11         | 0.004276101 | MAP3K7, DRB1, IFNGR2, IFNG, FRAS1,                                                                                     |

|                                                  |    |                 |                                                                                                                                                                                              |
|--------------------------------------------------|----|-----------------|----------------------------------------------------------------------------------------------------------------------------------------------------------------------------------------------|
|                                                  |    |                 | FRAS1, LRRC9, DQA1, FRAS1, ITGB2, DQA2                                                                                                                                                       |
| ecb05330:Allograft rejection                     | 10 | 0.00482715<br>2 | EQMCE1, DRB1, MHCX1, IFNG, FRAS1, FRAS1, LRRC9, DQA1, FRAS1, DQA2                                                                                                                            |
| ecb04940:Type I diabetes mellitus                | 10 | 0.01027829<br>4 | EQMCE1, DRB1, MHCX1, IFNG, FRAS1, FRAS1, LRRC9, DQA1, FRAS1, DQA2                                                                                                                            |
| ecb05416:Viral myocarditis                       | 10 | 0.01027829<br>4 | EQMCE1, DRB1, MHCX1, DQA3, DQB1, DQB2, DQA1, DRB2, ITGB2, DQA2                                                                                                                               |
| ecb04080:Neuroactive ligand-receptor interaction | 28 | 0.01096637<br>3 | UCN3, HTR1E, NPY, OPRM1, ADCYAP1, PTH2R, TACR3, PTGER3, DRD1, HTR5A, GABRG1, THRB, SST, HTR1F, CYSLTR2, EDN3, NMBR, GLRA3, HTR7, SSTR1, HTR1A, TRHR, GHR, QRFPR, GRID2, P2RX6, GABRR1, CHRM3 |
| ecb04742:Taste transduction                      | 10 | 0.01483062<br>7 | SV2C, HTR1E, TAS1R2, TAS2R40, HTR1F, TAS2R14, PKD2L1, HTR1A, TAS2R42, CHRM3                                                                                                                  |
| ecb05320:Autoimmune thyroid disease              | 10 | 0.01701537<br>8 | EQMCE1, DRB1, MHCX1, IFN-ALPHA2, FRAS1, FRAS1, LRRC9, DQA1, FRAS1, DQA2                                                                                                                      |
| ecb04921:Oxytocin signaling pathway              | 14 | 0.01768501      | PRKAB2, CAMK2D, GNAI2, KCNJ6, EGFR, RGS2, GNAO1, PLA2G4A, MAP2K2, ROCK2, RYR2, CACNB2, ROCK1, TRPM2                                                                                          |
| ecb04640:Hematopoietic cell lineage              | 12 | 0.01964059<br>5 | DRB1, CD1B2, DQA3, DQB1, CD1B1, DQB2, CD1E1, GYPA, DQA1, DRB2, TFRC, DQA2                                                                                                                    |
| ecb05166:Human T-cell leukemia virus 1 infection | 19 | 0.02674625<br>6 | MHCX1, MSX2, MAP3K1, ETS1, DQB2, EQMCE1, DRB1, MAP2K4, DQA3, DQB1, MAP2K2, DQA1, ANAPC5, BUB3, CCNE1, DRB2, ITGB2, DQA2, SLC25A4                                                             |
| ecb04658:Th1 and Th2 cell differentiation        | 10 | 0.02813509<br>8 | DRB1, IFNGR2, IL12RB2, IFNG, FRAS1, FRAS1, LRRC9, DQA1, FRAS1, DQA2                                                                                                                          |
| ecb05152:Tuberculosis                            | 16 | 0.02815620<br>1 | CAMK2D, IFNGR2, KSR1, IFN-ALPHA2, IFNG, DQB2, DRB1, PIK3C3, DQA3, DQB1, ATP6V1H, DQA1, DRB2, ITGB2, ECATH-3,                                                                                 |

|                                 |    |                 |                                                                                                                                                                                                                                                                                                                                                                                                                                                                                                                                                                                                                                                       |
|---------------------------------|----|-----------------|-------------------------------------------------------------------------------------------------------------------------------------------------------------------------------------------------------------------------------------------------------------------------------------------------------------------------------------------------------------------------------------------------------------------------------------------------------------------------------------------------------------------------------------------------------------------------------------------------------------------------------------------------------|
|                                 |    |                 | DQA2                                                                                                                                                                                                                                                                                                                                                                                                                                                                                                                                                                                                                                                  |
| ecb04530:Tight junction         | 15 | 0.03200504      | PRKAB2, F11R, HSPA4, CTTN, CD1B2, MAP3K1, RAPGEF2, MICALL2, NEDD4, CD1B1, ACTR3B, ROCK2, CD1E1, TJP1, ROCK1                                                                                                                                                                                                                                                                                                                                                                                                                                                                                                                                           |
| ecb04024:cAMP signaling pathway | 17 | 0.04424371<br>8 | CAMK2D, EDN3, HTR1E, GLI3, GNAI2, NPY, SSTR1, HTR1A, ADCYAP1, PTGER3, DRD1, SST, MAP2K2, HTR1F, ROCK2, RYR2, ROCK1                                                                                                                                                                                                                                                                                                                                                                                                                                                                                                                                    |
|                                 |    |                 | GALNTL5, SGMS1, NANP, CARNMT1, ENO4, SELENBP1, PLOD2, ALOX5, MINPP1, POMK, B3GALT1, ADPGK, EHMT1, PLA2G4A, ATP6V1H, CYP3A96, TYRP1, CYP7A1, GALNT14, ST6GAL2, PLCz, AACS, NDST4, BCKDHB, SI, ST6GALNAC4, MOCS1, CYP11B1, HYAL4, EXTL3, KYNU, MGAT4C, LPCAT4, PIGB, PIP5KL1, GUCY2D, LBR, DSE, ALOX15B, MAN1A2, B3GALNT1, BLVRA, ADK, FAH, GCNT1, PLCZ1, CYP2B46, CNDP2, PIK3C3, ENPP3, PRXL2B, PDE5A, CNDP1, GSDMC, CHST10, FGGY, SORD, MAT2B, MTCL1, NT5E, ACP5, ACADSB, SGPL1, ALOX12, ACO1, ALG14, NAMPT, ENPP3, INPP4B, SEMA3E, ELOVL5, GNPDA2, C1GALT1, ABO, GLDC, CYP2C108, SPTLC3, SPAM1, GSTA3, CYP3A89, ENPP1, RRP1, ND5, GSTA1, UXS1, LTA4H |
| ecb01100:Metabolic pathways     | 86 | 0.04824421<br>4 |                                                                                                                                                                                                                                                                                                                                                                                                                                                                                                                                                                                                                                                       |

**Table S3 GO pathway analysis**

| Category                 | Term                                                                       | Gene Count | P Value     | Gene                                                                                                                                                                                                                   |
|--------------------------|----------------------------------------------------------------------------|------------|-------------|------------------------------------------------------------------------------------------------------------------------------------------------------------------------------------------------------------------------|
| GOTERM<br>_BP_DIR<br>ECT | GO:0019882~antigen processing and presentation                             | 10         | 2.39E-05    | EQMCE1, DRB1, MHCX1, DQA3, DQB1, RAB4A, LRRC9, DQA1, FRAS1, DQA2                                                                                                                                                       |
| GOTERM<br>_BP_DIR<br>ECT | GO:0007268~chemical synaptic transmission                                  | 15         | 0.00368292  | HTR1E, SNCA, GLRA3, HTR7, HTR1A, OR5T40, HTR5A, GABRG1, LRP6, SV2C, SDCBP, HTR1F, CACNB2, GABRR1, CHRM3                                                                                                                |
| GOTERM<br>_BP_DIR<br>ECT | GO:0000902~cell morphogenesis                                              | 10         | 0.005961947 | CDH8, CDH7, YAP1, CYFIP1, CDH12, CDH19, CDH11, ARHGEF28, AP3B1, EGFR                                                                                                                                                   |
| GOTERM<br>_BP_DIR<br>ECT | GO:0043066~negative regulation of apoptotic process                        | 19         | 0.024972288 | GLI3, BCL2A1, DAPK1, PREX1, PRAME, VTCN1, ZFAND6, CITED2, EGFR, HIPK3, RASA1, SPRY2, CDC73, PSEN1, TCL1A, WNT7A, CAPN13, TFRC, ASCL1                                                                                   |
| GOTERM<br>_BP_DIR<br>ECT | GO:0035556~intracellular signal transduction                               | 24         | 0.041473254 | CLNK, STK32A, PLCZ, PREX1, CAB39L, ASB18, DAPK1, ARHGEF28, TNS3, PLCZ1, SRPK1, STK39, DCDC2C, MARK2, RGS6, PSEN1, SGK1, DCDC2, SDCBP, RPS6KA1, SPB4, CXCL8, GUCY2D, TFRC                                               |
| GOTERM<br>_BP_DIR<br>ECT | GO:0007156~homophilic cell adhesion via plasma membrane adhesion molecules | 11         | 0.046559993 | CDH8, CDH7, PCDH18, CDH2, CDH12, CDH19, KIRREL3, PCDH20, CDH11, CELSR3, PCDH10                                                                                                                                         |
| GOTERM<br>_CC_DIR<br>ECT | GO:0005887~integral component of plasma membrane                           | 55         | 0.00307342  | SGMS1, IFNGR2, SLC26A8, SYNDIG1, PCDH20, OPRM1, SLC39A12, GABRG1, HTR1F, CYSLTR2, SEMA6D, SLC28A2, PCDH10, NMBR, TMPRSS11A, HTR7, HTR1A, CEMIP2, PROKR1, DCBLD2, KIRREL3, QRFPR, TRPM1, IYD, CHRM3, OR56A1, OR4E2, KLR |

|                          |                          |     |             |                                                                                                                                                                                                                                                                                                                                                                                                                                                                                                                                                                                                                                                                                                                                                                                                                                                                                                                                                                                                                                                                                              |
|--------------------------|--------------------------|-----|-------------|----------------------------------------------------------------------------------------------------------------------------------------------------------------------------------------------------------------------------------------------------------------------------------------------------------------------------------------------------------------------------------------------------------------------------------------------------------------------------------------------------------------------------------------------------------------------------------------------------------------------------------------------------------------------------------------------------------------------------------------------------------------------------------------------------------------------------------------------------------------------------------------------------------------------------------------------------------------------------------------------------------------------------------------------------------------------------------------------|
| GOTERM<br>_CC_DIR<br>ECT | GO:0045202~synaps<br>e   | 23  | 0.009198062 | D1、HTR1E、MERTK、GYPA、OR5T40、DRD<br>1、HTR5A、PSEN1、SEMA3E、ABCA1、ALK<br>、PCDH18、SLC26A11、SLCO1B3、ADGRL3、<br>GLRA3、SSTR1、ABCB5、KCNK1、GHR、SLC<br>26A7、PKD2L1、SLCO4C1、KCNK2、P2RX6、<br>TFRC、TRPM2、GABRR1<br>CYFIP1、HTR1E、RIMS2、SNCA、GNAI2、GL<br>RA3、HTR7、HTR1A、AP3B1、CBLN4、OR5T<br>40、HTR5A、PSEN1、CBLN2、GABRG1、LRP<br>6、SDCBP、HTR1F、LY6E、ACTBL2、CACNB<br>2、GABRR1、CHRM3<br>PRKAB2、TRIM45、SMAP1、ALOX5、AMPH<br>、PPP1R14C、PRUNE2、MAPKAP1、PDE4DIP<br>、CSRP1、ELP4、DUSP10、PRMT3、ACTBL2<br>、PPFIA1、LYPLA1、TACC3、CAPN2、TTK、<br>CARS1、SASH1、IRAK1BP1、PRAME、TDRD7<br>、ASPM、HOOK1、SRPK1、TNFAIP3、VWA8<br>、HIPK3、MOB1B、SKP1、MARCHF1、OAS1<br>、ARRDC1、KLHL25、TNK2、VRK2、ROPN1L<br>、FBXO4、NIFK、SIPA1L1、SNCA、MERTK、<br>SPHKAP、CXXC4、ARHGEF11、NOVA1、PIK3<br>C3、AGA、MAP2K2、CDIN1、SERPINB8、BT<br>G1、ENAH、ZNF804A、CYFIP1、HTATIP2、M<br>AP3K1、SERPINB5、DAPK1、WDPCP、DZIP3<br>、CHD1、NUDCD1、PLK2、PTPN22、UXS1、<br>ATXN7L3B、ARHGAP28、KCNIP4、KSR1、UF<br>M1、PADI4、CDH2、UBASH3B、PRPF19、BA<br>TF、ACVR2A、RWDD3、MYO5B、URI1、PLA<br>2G4A、ROCK2、ROCK1、DYRK2、PADI2、CA<br>MK2D、UBR3、TBCA、GLI3、NOX3、KIF15、<br>TENT5A、KIZ、TRIM68、NEK1、RGS2、KYN |
|                          |                          |     |             |                                                                                                                                                                                                                                                                                                                                                                                                                                                                                                                                                                                                                                                                                                                                                                                                                                                                                                                                                                                                                                                                                              |
| GOTERM<br>_CC_DIR<br>ECT | GO:0005737~cytopl<br>asm | 159 | 0.030272449 |                                                                                                                                                                                                                                                                                                                                                                                                                                                                                                                                                                                                                                                                                                                                                                                                                                                                                                                                                                                                                                                                                              |

|                          |                                                      |    |             |                                                                                                                                                                                                                                                                                                                                                                                                                                                                                                                                                                                                                                                                                                                                                                                                                                                                                                     |
|--------------------------|------------------------------------------------------|----|-------------|-----------------------------------------------------------------------------------------------------------------------------------------------------------------------------------------------------------------------------------------------------------------------------------------------------------------------------------------------------------------------------------------------------------------------------------------------------------------------------------------------------------------------------------------------------------------------------------------------------------------------------------------------------------------------------------------------------------------------------------------------------------------------------------------------------------------------------------------------------------------------------------------------------|
|                          |                                                      |    |             | U, NEDD4, DOK5, SGK1, GARNL3, SDCBP<br>、 CDH11, PARP14, CCNE1, ALOX15B, DEU<br>P1, MRTO4, RNF167, NAP1L4, CAPN8, BL<br>VRA, TRIM21, TRIM26, STXBP5, ANXA10,<br>CYP2B46, FTO, ARRDC4, MARK2, SAMD5<br>、 ELP3, CFAP221, LGALS3, SNTG1, CAPN1<br>3, YAP1, MAP3K7, ACO1, ASAP2, HSPA1L<br>、 NAMPT, CAPN9, ENC1, INPP4B, NR5A2,<br>ARHGEF28, GNPDA2, PADI3, CYP2C108, SC<br>GB1A1, PTPN11, RBFOX2, PMP2, ANXA5,<br>PCMTD1, CPSF6, LRRCC1, DUSP22, FKBP1<br>A, LRRC9, RAP1GAP2, PLAAT1, PARP15,<br>CDADC1, PSPC1, LTA4H<br>TMX3, CDH2, GPC5, ACVR2A, HJV, RTP2<br>、 TFPI, SLC7A11, EGFR, ITGA8, HYAL4, L<br>RFN2, TSPEAR, PSEN1, LRFN5, ADAMTS15<br>、 DCBLD2, LRP6, ENPP1, WNT7A, ITGB8,<br>PKD2L1, SULF2, ZPLD1<br>TMX3, CDH2, GPC5, ACVR2A, HJV, RTP2<br>、 TFPI, SLC7A11, EGFR, ITGA8, HYAL4, L<br>RFN2, TSPEAR, PSEN1, LRFN5, ADAMTS15<br>、 DCBLD2, LRP6, ENPP1, WNT7A, ITGB8,<br>PKD2L1, SULF2, ZPLD1 |
| GOTERM<br>_CC_DIR<br>ECT | GO:0009986~cell<br>surface                           | 24 | 0.041485424 | OR5T40, HTR5A, HTR1E, GABRG1, GLRA3<br>、 HTR1F, HTR7, HTR1A, GABRR1, CHRM3<br>KCNP4, CAPN8, EYS, MAN1A2, CDH2, PA<br>DI4, VCAN, CDH12, PCDH20, ANXA10, PL<br>CZ1, CDH8, ENPP3 , PLA2G4A, THBS4, CD<br>H19, EFCAB3, RYR2, CAPN13, SULF2, PCD<br>H10, PADI2, VLDLR, PCDH18, PLCz, SPOC                                                                                                                                                                                                                                                                                                                                                                                                                                                                                                                                                                                                                |
| GOTERM<br>_MF_DIR<br>ECT | GO:0030594~neurot<br>ransmitter receptor<br>activity | 10 | 0.007542982 |                                                                                                                                                                                                                                                                                                                                                                                                                                                                                                                                                                                                                                                                                                                                                                                                                                                                                                     |
| GOTERM<br>_MF_DIR<br>ECT | GO:0005509~calciu<br>m ion binding                   | 41 | 0.011430849 |                                                                                                                                                                                                                                                                                                                                                                                                                                                                                                                                                                                                                                                                                                                                                                                                                                                                                                     |

|                          |                                                                 |    |             |                                                                                                                                |
|--------------------------|-----------------------------------------------------------------|----|-------------|--------------------------------------------------------------------------------------------------------------------------------|
|                          |                                                                 |    |             | K3、CAPN9、CAPN2、CETN1、MCTP2、PADI3、CELSR3、CDH7、CEMIP2、ANXA5、CRNN、MATN1、CDH11、PKD2L1、TRPM2、ALOX15B                                |
| GOTERM<br>_MF_DIR<br>ECT | GO:0004712~protein<br>serine/threonine/tyrosine kinase activity | 19 | 0.017675014 | MAP3K7、CAMK2D、TTK、MERTK、DAPK1、STK39、EGFR、PLK2、MARK2、SGK1、RPS6KA1、EPHA6、TNK2、ALK、ROCK2、FRK、MAP3K21、ROCK1、DYRK2                  |
| GOTERM<br>_MF_DIR<br>ECT | GO:0004672~protein kinase activity                              | 15 | 0.045718707 | MYO3B、CAMK2D、KSR1、MAP3K1、NEK1、BUB1、SRPK1、POMK、HIPK3、PIK3C3、TRIB2、MAP2K4、TEX14、MAP3K21、GUCY2D                                   |
| GOTERM<br>_MF_DIR<br>ECT | GO:0020037~heme binding                                         | 13 | 0.047036578 | PXDNL、EPX、THAP4、CYP11B1、CYP2C108、CYP2B46、CYP4X1、CYP3A89、CYP3A96、CYP4F124、CYP7A1、CYB5R4、FLVCR2                                  |
| GOTERM<br>_MF_DIR<br>ECT | GO:0004674~protein serine/threonine kinase activity             | 21 | 0.047891973 | STK32A、OBSCN、TTK、DAPK1、ACVR2A、MAP3K1、NEK1、SRPK1、STK39、HIPK3、PLK2、MARK2、MAP2K4、PSKH2、SGK1、RPS6KA1、MAP2K2、ROCK2、VRK2、ROCK1、DYRK2 |
